# Supplementary material for: Unconventional interactions of the TRPV4 ion channel with beta-adrenergic receptor ligands
Source: Life Sci Alliance. 2022 Dec 22;6(3):e202201704. doi: 10.26508/lsa.202201704 (PMC9780703; doi:10.26508/lsa.202201704)
Supplement: Supplementary file 2 [file LSA-2022-01704_SdataFS1.xlsx]

## Sheet: Panel C
	mQ	In out	outout										Statistics	Number of families	1
	-0.0094518	0.0732787	0.475373											Number of comparisons per family	3
	0.140488	0.395144	0.508068											Alpha	0.05
	0.327899	0.163934	0.817208
	0.0630222	0.731507	0.516367											Tukey's multiple comparisons test	Mean Diff.	95.00% CI of diff.	Significant?	Summary	Adjusted P Value
	-0.0683112	0.216561	0.38961
	0.132025	0.250122	0.402247											mQ vs. In out	-0.2317	-0.4021 to -0.0613	Yes	**	0.0057	A-B
	0.15739	0.440784	0.407572											mQ vs. outout	-0.4151	-0.5827 to -0.2476	Yes	****	<0.0001	A-C
	0.103539	0.426673	0.79386											In out vs. outout	-0.1834	-0.3436 to -0.02324	Yes	*	0.0218	B-C
	0.144272	0.583832	0.489736
	0.107176	0.773973	0.710702
	0.307847	0.260304	0.417476											Test details	Mean 1	Mean 2	Mean Diff.	SE of diff.	n1	n2	q	DF
		0.208333	0.663469
		0.149123	0.535302											mQ vs. In out	0.1278	0.3595	-0.2317	0.06963	11	13	4.706	35
			0.474286											mQ vs. outout	0.1278	0.5429	-0.4151	0.06848	11	14	8.573	35
														In out vs. outout	0.3595	0.5429	-0.1834	0.06546	13	14	3.963	35
Average	0.127809	0.359505	0.542948
SD	0.116743	0.224054	0.144732
SEM	0.0351994	0.0621415	0.0386812
IN-out	TRPV4+vehicle
	EXP	1261-4	1262-5	1263-6	1272-3	1277-8	1278-9	1280-11	1471-9	3251-7	3254-10	1472-9
	Leak	67	37	12	8	19	9	37	30	99	17	14
	GSK Pre vhc	596	3112	1668	4197	2127	1130	1079	793	806	1090	511
	GSK Post vhc	601	2680	1125	3933	2271	982	915	714	704	975	358
	GSK Pre V - leak	529	3075	1656	4189	2108	1121	1042	763	707	1073	497
	GSK Post V - leak	534	2643	1113	3925	2252	973	878	684	605	958	344
	Normalized	1.00945	0.859512	0.672101	0.936978	1.06831	0.867975	0.84261	0.896461	0.855728	0.892824	0.692153
	1-(I/Imax)	-0.0094518	0.140488	0.327899	0.0630222	-0.0683112	0.132025	0.15739	0.103539	0.144272	0.107176	0.307847
IN-out	TRPV4 + salbutamol
	EXP	E-1222-3	E-1224-5	E-1231-10	E-1236-5	E-1241-10	E-1245-14	E-1255-7	E-1257-9	E-14665	E-14670	E-14676	E-14679	E-14680
	Leak	10.701	7.5425	11.227	4.3383	11.788	18.537	17.709	21.971	10	8	9	4	11
	GSK Pre salb	2655.4	1114.1	2662.3	307.57	1350.9	299.12	793.6	2616.7	1680	1030	931	1300	695
	GSK Post salb	2461.6	676.85	2227.7	85.754	1060.9	228.94	451.6	1509.6	705	239	691	1030	593
	GSK Pre S - leak	2644.7	1106.56	2651.07	303.232	1339.11	280.583	775.891	2594.73	1670	1022	922	1296	684
	GSK Post S- leak	2450.9	669.308	2216.47	81.4157	1049.11	210.403	433.891	1487.63	695	231	682	1026	582
	Normalized	0.926721	0.604856	0.836066	0.268493	0.783439	0.749878	0.559216	0.573327	0.416168	0.226027	0.739696	0.791667	0.850877
	1-(I/Imax)	0.0732787	0.395144	0.163934	0.731507	0.216561	0.250122	0.440784	0.426673	0.583832	0.773973	0.260304	0.208333	0.149123
Salbutamol(closed)
	EXP	E-956-10	E-943-10	E-944-11	E-1020-4	1496?	1496-7	1497-0	1497-4	5204-2	5208-6	5211-9	5215-13	5220-17	5221-1
	Leak	56.602	21.981	51.314	45.854	15	42	19	29	28	8	8	20	43	7
	GSK Pre salb	412.07	1518.1	1285.7	1636.7	1940	487	468	713	710	606	1141	1375	822	182
	GSK Post salb	243.09	757.97	276.95	815.24	1190	308	285	170	376	181	668	476	405	99
	GSK Pre S - leak	355.468	1496.12	1234.39	1590.85	1925	445	449	684	682	598	1133	1355	779	175
	GSK Post S- leak	186.488	735.989	225.636	769.386	1175	266	266	141	348	173	660	456	362	92
	Normalized	0.524627	0.491932	0.182792	0.483633	0.61039	0.597753	0.592428	0.20614	0.510264	0.289298	0.582524	0.336531	0.464698	0.525714
	1-(I/Imax)	0.475373	0.508068	0.817208	0.516367	0.38961	0.402247	0.407572	0.79386	0.489736	0.710702	0.417476	0.663469	0.535302	0.474286
Channel	TRPV4
Configuration	in-out & out-out
Recording solution	130 mM NaCl
	3 mM HEPES
	1 mM EDTA
