# Supplementary material for: Unconventional interactions of the TRPV4 ion channel with beta-adrenergic receptor ligands
Source: Life Sci Alliance. 2022 Dec 22;6(3):e202201704. doi: 10.26508/lsa.202201704 (PMC9780703; doi:10.26508/lsa.202201704)
Supplement: Supplementary file 3 [file LSA-2022-01704_SdataF2.xlsx]

## Sheet: Panel A
2A. DR curve Salbutamol										Channel	TRPV4
	10 uM	25 uM	50 uM	100 uM	175 uM	250 uM	500 uM	1 mM		Configuration	out-out
	0.128089	0.239245	0.140921	0.25957	0.147887	0.664844	0.475373	0.479153		Recording solution	130 mM NaCl
	0.150943	0.197863	0.524991	0.320161	0.384683	0.227669	0.21668	0.424194			3 mM HEPES
	0.115589	0.210434	0.0991597	0.1737	0.476319	0.552415	0.508068	0.448979			1 mM EDTA
	0.0170175	0.0932146	0.178196	0.207368	0.571926	0.229781	0.817208
	0.071362	0.229582	0.391321	0.33497	0.464041	0.299371	0.233123			KD	81.3 µM
	0.124675	0.0970924	0.406859	0.253083	0.205195	0.367437	0.516367			No. Hill	1.4
	0.0279946	0.0414723	0.121141	0.189079	0.283784	0.754335	0.38961
	0.119976	0.209877	0.164745	0.585932	0.594952	0.677966	0.402247
			0.180702		0.198333	0.525499	0.407572
			0.168707		0.344183		0.79386
					0.375485
					0.183206
Average	0.0944558	0.164848	0.237674	0.290483	0.3525	0.477702	0.476011	0.450775
SD	0.049685	0.0754651	0.14673	0.132737	0.152867	0.202319	0.201091	0.0275235
SEM	0.0175663	0.0266809	0.0464002	0.0469295	0.0441289	0.0674395	0.0635904	0.0158907
				10 uM
EXP	E-1138-1	E-1141-4	E-1143-6	E-1146-8	E-1149-11	E-1159-8	1456-2	1456-6
leak	9.8942	32.164	43.961	8.865	19.042	13.996	55	33
GSK 300 nM presalb	1191.1	2233	3608.3	1289.9	1903.8	2900.7	3770	1700
GSK 300 nM postsalb	1039.8	1900.8	3196.3	1268.1	1769.3	2540.8	3666	1500
GSK 300nM pre - leak	1181.21	2200.84	3564.34	1281.04	1884.76	2886.7	3715	1667
GSK 300nM post - leak	1029.91	1868.64	3152.34	1259.23	1750.26	2526.8	3611	1467
Normalized	0.871911	0.849057	0.884411	0.982983	0.928638	0.875325	0.972005	0.880024
1-(I/Imax)	0.128089	0.150943	0.115589	0.0170175	0.071362	0.124675	0.0279946	0.119976
					25 uM
EXP	E-1119-1	E-1120-2	E-1126-8	E-1128-10	E-1130-12	E-1134-15	1455-1	1455-6
leak	18.322	16.632	15.218	25.355	13.312	15.145	61	9
GSK 300 nM presalb	922.54	1651.6	1094.7	2811.4	870.48	691.82	1990	900
GSK 300 nM postsalb	706.21	1328.1	867.54	2551.7	673.69	626.12	1910	713
GSK 300nM pre - leak	904.218	1634.97	1079.48	2786.05	857.168	676.675	1929	891
GSK 300nM post - leak	687.888	1311.47	852.322	2526.34	660.378	610.975	1849	704
Normalized	0.760755	0.802137	0.789566	0.906785	0.770418	0.902908	0.958528	0.790123
1-(I/Imax)	0.239245	0.197863	0.210434	0.0932146	0.229582	0.0970924	0.0414723	0.209877
					50 uM
EXP	E-1071-9	E-1081-6	E-1105-2	E-1111-7	E-1117-11	E-1119-13	1499?	14502	14505	14511
leak	11.051	6.3516	150.96	26.933	36.335	12.568	2	79	197	97
GSK 300 nM presalb	752.39	1718.4	1095.9	1037.9	2387.6	1716.6	5120	1900	3130	3120
GSK 300 nM postsalb	647.92	819.59	1002.2	857.75	1467.5	1023.3	4500	1600	2600	2610
GSK 300nM pre - leak	741.339	1712.05	944.94	1010.97	2351.26	1704.03	5118	1821	2933	3023
GSK 300nM post - leak	636.869	813.238	851.24	830.817	1431.16	1010.73	4498	1521	2403	2513
Normalized	0.859079	0.475009	0.90084	0.821804	0.608679	0.593141	0.878859	0.835255	0.819298	0.831293
1-(I/Imax)	0.140921	0.524991	0.0991597	0.178196	0.391321	0.406859	0.121141	0.164745	0.180702	0.168707
				100uM
EXP	E-1034-6	E-1038-10	E-1044-14	E-1046-15	E-1047-16	E-1051-3	E-1052-4	E-1058-10
leak	12.876	29.856	111.45	38.752	20.431	11.311	20.294	22.308
GSK 300 nM presalb	1263.6	2996.8	3378	827.35	733.27	1147.3	1111.9	174.08
GSK 300 nM postsalb	938.95	2046.9	2810.6	663.82	494.49	859.8	905.5	85.152
GSK 300nM pre - leak	1250.72	2966.94	3266.55	788.598	712.839	1135.99	1091.61	151.772
GSK 300nM post - leak	926.074	2017.04	2699.15	625.068	474.059	848.489	885.206	62.844
Normalized	0.74043	0.679839	0.8263	0.792632	0.66503	0.746917	0.810921	0.414068
1-(I/Imax)	0.25957	0.320161	0.1737	0.207368	0.33497	0.253083	0.189079	0.585932
						175 uM
EXP	E-14568	E-14572	E-14594	E-14596	E-14602		E-	E-14611	E-14612	E-14615	E-14616	E-14617
leak	30	14	53	20	40	16	48	36	19	27	61	50
GSK 300 nM presalb	1450	1150	2270	882	624	401	492	1700	619	2700	1350	1360
GSK 300 nM postsalb	1240	713	1214	389	353	322	366	710	500	1780	866	1120
GSK 300nM pre - leak	1420	1136	2217	862	584	385	444	1664	600	2673	1289	1310
GSK 300nM post - leak	1210	699	1161	369	313	306	318	674	481	1753	805	1070
Normalized	0.852113	0.615317	0.523681	0.428074	0.535959	0.794805	0.716216	0.405048	0.801667	0.655817	0.624515	0.816794
1-(I/Imax)	0.147887	0.384683	0.476319	0.571926	0.464041	0.205195	0.283784	0.594952	0.198333	0.344183	0.375485	0.183206
					250 uM
EXP	E-1004-10	E-1005-11	E-1010-2	E-999-5	E-1012-4	1492-8	1493-0	1493-2	1493-4
leak	28.185	27.927	10.546	10.35	22.486	37	51	18	24
GSK 300 nM presalb	1734.9	885.84	1087.4	1897.8	1475.2	946	743	372	475
GSK 300 nM postsalb	600.2	690.52	492.53	1464.1	1040.3	612	221	132	238
GSK 300nM pre - leak	1706.71	857.913	1076.85	1887.45	1452.71	909	692	354	451
GSK 300nM post - leak	572.015	662.593	481.984	1453.75	1017.81	575	170	114	214
Normalized	0.335156	0.772331	0.447585	0.770219	0.700629	0.632563	0.245665	0.322034	0.474501
1-(I/Imax)	0.664844	0.227669	0.552415	0.229781	0.299371	0.367437	0.754335	0.677966	0.525499
					500 uM
EXP	E-956-10	E-963-17	E-943-10	E-944-11	E-1017-1	E-1020-4	1496?	1496-7	1497-0	1497-4
leak	56.602	27.412	21.981	51.314	27.558	45.854	15	42	19	29
GSK 300 nM presalb	412.07	1061.1	1518.1	1285.7	986.45	1636.7	1940	487	468	713
GSK 300 nM postsalb	243.09	837.12	757.97	276.95	762.91	815.24	1190	308	285	170
GSK 300nM pre - leak	355.468	1033.69	1496.12	1234.39	958.892	1590.85	1925	445	449	684
GSK 300nM post - leak	186.488	809.708	735.989	225.636	735.352	769.386	1175	266	266	141
Normalized	0.524627	0.78332	0.491932	0.182792	0.766877	0.483633	0.61039	0.597753	0.592428	0.20614
1-(I/Imax)	0.475373	0.21668	0.508068	0.817208	0.233123	0.516367	0.38961	0.402247	0.407572	0.79386
		1 mM
EXP	E-981-1	E-989-8	E-992-10
leak	24.307	83.769	13.812
GSK 300 nM presalb	428.04	844.01	552.39
GSK 300 nM postsalb	234.59	521.52	310.58
GSK 300nM pre - leak	403.733	760.241	538.578
GSK 300nM post - leak	210.283	437.751	296.768
Normalized	0.520847	0.575806	0.551021
1-(I/Imax)	0.479153	0.424194	0.448979

## Sheet: Panel B
2B. Time course		Average	SD	SEM	I inhibited	Average x100	SD x100			Channel	TRPV4
Pulse -60mV		0.776715	0.136523	0.0455077	0.223285	22.3285	13.6523			Configuration	out-out
GSK300nM / Salb 500uM		0.716073	0.122755	0.0434003	0.283927	28.3927	12.2755			Recording solution	130 mM NaCl
outout		0.693253	0.0924534	0.0326872	0.306747	30.6747	9.24534				3 mM HEPES
		0.632223	0.208865	0.073845	0.367777	36.7777	20.8865				1 mM EDTA
		0.69427	0.120383	0.0380683	0.30573	30.573	12.0383
		0.62546	0.229448	0.0764826	0.37454	37.454	22.9448			Tau (seg)	225.6
		0.47304	0.178051	0.0593503	0.52696	52.696	17.8051
		0.487246	0.211141	0.0703802	0.512754	51.2754	21.1141
		0.338759	0.258026	0.081595	0.661241	66.1241	25.8026
		0.42894	0.247197	0.0781705	0.57106	57.106	24.7197
		0.374301	0.194287	0.0971437	0.625699	62.5699	19.4287
		0.417471	0.19145	0.0957252	0.582529	58.2529	19.145
30s	Tiempo 30 seg
	Exp	E14925	1492-7	1493-0	1493-2	1624-3	1626-5	1631-9	1484-5	1488-9
	Leak	25	11.6	10	28	126	16	7	7	26
	GSK presalb	1188	318	778	647	1029	1704	1313	498	938
	GSK postsalb	1167	208	636	472	697	1311	1082	487	605
	GSK pre - leak	1163	306.4	768	619	903	1688	1306	491	912
	GSK post - leak	1142	196.4	626	444	571	1295	1075	480	579
	Normalized	0.981943	0.640992	0.815104	0.717286	0.632337	0.76718	0.823124	0.977597	0.634868			Average	0.776715	0.223285
													SD	0.136523
1min	60 seg												SEM	0.0455077
	Exp	1493-7	1493-8	1447	1490-3	1492-4	1499-11	1500-12	1503-14
	Leak	18	19	24	92	8	168	8	32
	GSK presalb	949	953	1000	1005	2189	1435	443	328
	GSK postsalb	682	843	734	646	1100	1226	305	263
	GSK pre - leak	931	934	976	913	2181	1267	435	296
	GSK post - leak	664	824	710	554	1092	1058	297	231				Average	0.716073	0.283927
	Normalized	0.713212	0.882227	0.727459	0.606791	0.500688	0.835043	0.682759	0.780405				SD	0.122755
													SEM	0.0434003
1.3min	90 seg
	Exp	1495-3	1495-9	1496-0	1504-1	1506-3	1508-5	1510-7	1512-8
	Leak	21	22	11	12	6	24	99	133
	GSK presalb	883	156	1440	913	320	754	1007	1899
	GSK postsalb	658	110	958	590	188	629	843	1225
	GSK pre - leak	862	134	1429	901	314	730	908	1766
	GSK post - leak	637	88	947	578	182	605	744	1092
	Normalized	0.738979	0.656716	0.662701	0.641509	0.579618	0.828767	0.819383	0.618347				Average	0.693253	0.306747
													SD	0.0924534
2min	120 SEG												SEM	0.0326872
	Exp	1496-1	1496-3	1496-4	1497-1	1515-1	1518-3	1521-6	1522-7
	Leak	24	57	22	5	10	31	12	4
	GSK presalb	702	2040	1100	421	647	978	1582	848
	GSK postsalb	331	942	595	246	542	429	1403	769
	GSK pre - leak	678	1983	1078	416	637	947	1570	844
	GSK post - leak	307	885	573	241	532	398	1391	765
	Normalized	0.452802	0.446293	0.53154	0.579327	0.835165	0.420275	0.885987	0.906398				Average	0.632223	0.367777
													SD	0.208865
2.3min	150 seg												SEM	0.073845
	Exp	1497-3	1497-9	1497-5	1499-5	1499-6	1525-2	1526-3	1527-4	1529-6	1530-7
	Leak	32	28	25	3	11	22	9	24	5	12
	GSK presalb	1160	881	1210	259	323	655	904	1719	855	825
	GSK postsalb	946	536	1000	169	197	463	700	828	580	703
	GSK pre - leak	1128	853	1185	256	312	633	895	1695	850	813
	GSK post - leak	914	508	975	166	186	441	691	804	575	691
	Normalized	0.810284	0.595545	0.822785	0.648438	0.596154	0.696682	0.772067	0.474336	0.676471	0.849938		Average	0.69427	0.30573
													SD	0.120383
3min	180 seg												SEM	0.0380683
	Exp	1499-7	1499-8	1500-1	1500-3	1500-9	1532-8	1533-9	1534-10	1537-12
	Leak	17	18	24	15	30	26	26	18	6
	GSK presalb	688	502	709	960	700	514	1849	1706	531
	GSK postsalb	426	488	451	467	617	433	777	944	151
	GSK pre - leak	671	484	685	945	670	488	1823	1688	525
	GSK post - leak	409	470	427	452	587	407	751	926	145
	Normalized	0.609538	0.971074	0.623358	0.478307	0.876119	0.834016	0.411958	0.548578	0.27619			Average	0.62546	0.37454
													SD	0.229448
3.3min	210 seg												SEM	0.0764826
	Exp	1501-0	1501-1	1501-2	1501-3	1501-5	1541-4	1544-6	1547-8	1548-9
	Leak	6	25	35	24	11	10	6	45	68
	GSK presalb	2740	972	1240	1420	413	1738	499	664	1456
	GSK postsalb	727	742	317	540	185	1015	243	322	1026
	GSK pre - leak	2734	947	1205	1396	402	1728	493	619	1388
	GSK post - leak	721	717	282	516	174	1005	237	277	958
	Normalized	0.263716	0.757128	0.234025	0.369628	0.432836	0.581597	0.48073	0.447496	0.690202			Average	0.47304	0.52696
													SD	0.178051
4min	240 seg												SEM	0.0593503
	Exp	1501-7	1501-8	1502-0	1502-1	1550-10	1551-11	1552-12	1581-3	1582-4
	Leak	13	9	18	12	14	42	27	4	12
	GSK presalb	950	870	1300	1880	2558	1152	1867	802	585
	GSK postsalb	208	192	732	542	2009	600	1185	568	299
	GSK pre - leak	937	861	1282	1868	2544	1110	1840	798	573
	GSK post - leak	195	183	714	530	1995	558	1158	564	287
	Normalized	0.208111	0.212544	0.556942	0.283726	0.784198	0.502703	0.629348	0.706767	0.500873			Average	0.487246	0.512754
													SD	0.211141
4.3min	270 seg												SEM	0.0703802
	Exp	1502-2	1502-3	1502-4	1502-5	1502-6	1588-9	1592-12	1593-13	1594-14	1617-4
	Leak	7	8	7	10	6	11	4	7	3	14
	GSK presalb	1300	1940	1600	350	1400	1637	703	1447	439	919
	GSK postsalb	749	766	227	53	174	538	671	450	116	187
	GSK pre - leak	1293	1932	1593	340	1394	1626	699	1440	436	905
	GSK post - leak	742	758	220	43	168	527	667	443	113	173		Average	0.338759	0.661241
	Normalized	0.573859	0.39234	0.138104	0.126471	0.120516	0.324108	0.95422	0.307639	0.259174	0.19116		SD	0.258026
													SEM	0.081595
5min	300 seg
	Exp	1502-8	1503-0	1503-1	1503-4	1503-6	1602-2	1603-3	1604-4	1606-6	1608-8
	Leak	59	12	6	29	10	12	10	16	5	4
	GSK presalb	924	503	164	2060	1415	3020	1649	183	922	1711
	GSK postsalb	550	176	106	1900	361	1374	179	59	192	971
	GSK pre - leak	865	491	158	2031	1405	3008	1639	167	917	1707
	GSK post - leak	491	164	100	1871	351	1362	169	43	187	967		Average	0.42894	0.57106
	Normalized	0.56763	0.334012	0.632911	0.921221	0.249822	0.452793	0.103112	0.257485	0.203926	0.566491		SD	0.247197
													SEM	0.0781705
5.3min	330s
	Exp	6384-8	6386-10	6387-11	6389-2
	leak	28	44	18	33
	GSK 300nM	1256	1465	1735	1515
	GSKpost	731	750	280	441
	GSKi-leak	1228	1421	1717	1482
	GSKp-leak	703	706	262	408								Average	0.374301	0.625699
	Normalized	0.572476	0.496833	0.152592	0.275304								SD	0.194287
													SEM	0.0971437
6min	360 s
	Exp	6394-5	6395-6	6399-10	6400-11
	leak	113	8	26	10
	GSK 300nM	6106	3342	83	1595
	GSKpost	3103	938	63	395
	GSKi-leak	5993	3334	57	1585								Average	0.417471	0.582529
	GSKp-leak	2990	930	37	385								SD	0.19145
	Normalized	0.498915	0.278944	0.649123	0.242902								SEM	0.0957252

## Sheet: Panel C
2C. Recovered after salbutamol			time	Average	SD	SEM			Channel	TRPV4
			0s	0.160216	0.0890559	0.039827			Configuration	out-out
			1m	0.397803	0.140476	0.0628228			Recording solution	130 mM NaCl
			2m	0.461021	0.177748	0.0794915				3 mM HEPES
			3m	0.481637	0.217863	0.0974314				1 mM EDTA
			4m	0.468761	0.212349	0.0949654
			5m	0.431494	0.193746	0.0866457
			6m	0.418847	0.19422	0.0868577
			7m	0.39816	0.171576	0.0767311
			8m	0.382241	0.161688	0.0723089
			9m	0.384708	0.182827	0.0817626
			10m	0.371534	0.177768	0.0795004
		Exp	6364-9	6365-10	6375-1	6376-2	6377-3
		leak	57	75	12	25	54
		GSK initial	1329	1874	2708	909	1099
		5m salb 500 µM	265	320	67	148	102
	Raw data	GSK post 0s	270	307	176	293	201
		GSK post 1m	480	1175	710	434	392
		GSK post 2m	838	1209	660	477	377
		GSK post 3m	967	1286	604	459	377
		GSK post 4m	979	1158	609	477	351
		GSK post 5m	912	1011	476	451	379
		GSK post 6m	901	1007	435	419	378
		GSK post 7m	840	929	468	411	362
		GSK post 8m	803	856	437	409	366
		GSK post 9m	886	862	458	371	344
		GSK post 10m	835	827	368	389	351
		GSK initial	1272	1799	2696	884	1045
		5m salb 500 µM	208	245	55	123	48
		GSK post 0s	213	232	164	268	147
		GSK post 1m	423	1100	698	409	338
	without leak	GSK post 2m	781	1134	648	452	323
		GSK post 3m	910	1211	592	434	323
		GSK post 4m	922	1083	597	452	297
		GSK post 5m	855	936	464	426	325
		GSK post 6m	844	932	423	394	324
		GSK post 7m	783	854	456	386	308
		GSK post 8m	746	781	425	384	312
		GSK post 9m	829	787	446	346	290
		GSK post 10m	778	752	356	364	297
									Average	SD	SEM
		GSK initial	1	1	1	1	1		1	0	0
		5m salb 500 µM	0.163522	0.136187	0.0204006	0.13914	0.045933		0.101037	0.0635028	0.0283993
		GSK post 0s	0.167453	0.128961	0.0608309	0.303167	0.14067		0.160216	0.0890559	0.039827
		GSK post 1m	0.332547	0.611451	0.258902	0.46267	0.323445		0.397803	0.140476	0.0628228
	Normalized	GSK post 2m	0.613994	0.63035	0.240356	0.511312	0.309091		0.461021	0.177748	0.0794915
		GSK post 3m	0.715409	0.673152	0.219585	0.49095	0.309091		0.481637	0.217863	0.0974314
		GSK post 4m	0.724843	0.602001	0.221439	0.511312	0.284211		0.468761	0.212349	0.0949654
		GSK post 5m	0.67217	0.520289	0.172107	0.4819	0.311005		0.431494	0.193746	0.0866457
		GSK post 6m	0.663522	0.518066	0.156899	0.445701	0.310048		0.418847	0.19422	0.0868577
		GSK post 7m	0.615566	0.474708	0.169139	0.436652	0.294737		0.39816	0.171576	0.0767311
		GSK post 8m	0.586478	0.43413	0.157641	0.434389	0.298565		0.382241	0.161688	0.0723089
		GSK post 9m	0.65173	0.437465	0.16543	0.391403	0.277512		0.384708	0.182827	0.0817626
		GSK post 10m	0.611635	0.41801	0.132047	0.411765	0.284211		0.371534	0.177768	0.0795004
