# Supplementary material for: Unconventional interactions of the TRPV4 ion channel with beta-adrenergic receptor ligands
Source: Life Sci Alliance. 2022 Dec 22;6(3):e202201704. doi: 10.26508/lsa.202201704 (PMC9780703; doi:10.26508/lsa.202201704)
Supplement: Supplementary file 9 [file LSA-2022-01704_SdataF8.xlsx]

## Sheet: Panel B
	WT	S667A	S687A	S667A-S687A			Statistics	Number of families	1
	0.475373	0.592982	0.325243	0.000463607				Number of comparisons per family	6
	0.21668	0.437252	0.345277	0.00186916				Alpha	0.05
	0.508068	0.499439	0.139367	0.397859
	0.817208	0.461481	0.530533	0.0859986				Tukey's multiple comparisons test	Mean Diff.	95.00% CI of diff.	Significant?	Summary	Adjusted P Value
	0.516367	0.382281	0.389392	0.000532623
	0.38961	0.612851	0.153983	0.210571				WT vs. S667A	0.1691	0.02191 to 0.3162	Yes	*	0.0178	A-B
	0.402247	0.428241	0.532074	0.131407				WT vs. S687A	0.2907	0.1521 to 0.4294	Yes	****	<0.0001	A-C
	0.407572	0.4208	0.167734	0.00246305				WT vs. S667A-S687A	0.4916	0.3445 to 0.6388	Yes	****	<0.0001	A-D
	0.79386	0.427721	0.0977965	0.0528688				S667A vs. S687A	0.1217	-0.05562 to 0.299	No	ns	0.2802	B-C
	0.489736	0.515873	0.278752	0.114943				S667A vs. S667A-S687A	0.3226	0.1386 to 0.5066	Yes	****	<0.0001	B-D
	0.710702	0.235423	0.261981	0.000102849				S687A vs. S667A-S687A	0.2009	0.02359 to 0.3782	Yes	*	0.02	C-D
	0.417476	0.167691	0.243371	0.311861
	0.663469		0.506348
	0.535302		0.370229					Test details	Mean 1	Mean 2	Mean Diff.	SE of diff.	n1	n2	q	DF
	0.474286
	0.333767							WT vs. S667A	0.6009	0.4318	0.1691	0.05603	43	12	4.267	77
	0.813439							WT vs. S687A	0.6009	0.3101	0.2907	0.05281	43	14	7.786	77
	0.586571							WT vs. S667A-S687A	0.6009	0.1092	0.4916	0.05603	43	12	12.41	77
	0.779967							S667A vs. S687A	0.4318	0.3101	0.1217	0.06752	12	14	2.549	77
	0.523389							S667A vs. S667A-S687A	0.4318	0.1092	0.3226	0.07007	12	12	6.511	77
	0.756974							S687A vs. S667A-S687A	0.3101	0.1092	0.2009	0.06752	14	12	4.208	77
	0.874946
	0.808012
	0.825383
	0.565986
	0.843077
	0.326839
	0.30041
	0.811813
	0.853746
	0.378467
	0.643674
	0.598561
	0.537166
	0.291391
	0.725367
	0.87527
	0.631579
	0.632701
	0.899344
	0.712286
	0.784475
	0.305889
Average	0.600894	0.431836	0.310149	0.109245
SD	0.196051	0.128712	0.145274	0.133946
SEM	0.0298974	0.0371558	0.0388262	0.0386668
WT	Type	WT	WT	WT	WT	WT	WT	WT	WT	WT	WT	WT	WT	WT	WT	WT	WT	WT	WT	WT	WT	WT	WT	WT	WT	WT	WT	WT	WT	WT	WT	WT	WT	WT	WT	WT	WT	WT	WT	WT	WT	WT	WT	WT
	EXP	E-956-10	E-963-17	E-943-10	E-944-11	E-1020-4	1496?	1496-7	1497-0	1497-4	5204-2	5208-6	5211-9	5215-13	5220-17	5221-1	5575-3	5578-5	5583-1	5586-4	5594-2	5597-5	5604-3	5608-7	5610-9	5612-11	5618-2	2002	1534-7	1535-2	1535-8	2009	2013	2181-1	2188-8	2192-12	2197-17	5773-7	5788-19	5790-21	5791-1	5799-9	5913-9	5890-11
	Leak	56.602	27.412	21.981	51.314	45.854	15	42	19	29	28	8	8	20	43	7	19	9	9	25	18	34	45	26	105	25	16	33	43	18	31	105	80	28	11	40	148	21	23	16	63	15	42	9
	GSK Pre salb	412.07	1061.1	1518.1	1285.7	1636.7	1940	487	468	713	710	606	1141	1375	822	182	3096	1140	4462	1243	1942	2651	2356	4120	1279	4041	341	2548	2240	2473	2554	6235	2878	2113	1020	1097	2056	2338	137	2597	2348	1944	5517	3507
	GSK Post salb	243.09	837.12	757.97	276.95	815.24	1190	308	285	170	376	181	668	476	405	99	2069	220	1850	293	935	670	334	812	310	1768	67	1726	1580	480	400	3915	1077	865	478	789	672	310	65	964	293	570	1222	2437
	GSK Pre S - leak	355.468	1033.69	1496.12	1234.39	1590.85	1925	445	449	684	682	598	1133	1355	779	175	3077	1131	4453	1218	1924	2617	2311	4094	1174	4016	325	2515	2197	2455	2523	6130	2798	2085	1009	1057	1908	2317	114	2581	2285	1929	5475	3498
	GSK Post S- leak	186.488	809.708	735.989	225.636	769.386	1175	266	266	141	348	173	660	456	362	92	2050	211	1841	268	917	636	289	786	205	1743	51	1693	1537	462	369	3810	997	837	467	749	524	289	42	948	230	555	1180	2428
	Normalized	0.524627	0.78332	0.491932	0.182792	0.483633	0.61039	0.597753	0.592428	0.20614	0.510264	0.289298	0.582524	0.336531	0.464698	0.525714	0.666233	0.186561	0.413429	0.220033	0.476611	0.243026	0.125054	0.191988	0.174617	0.434014	0.156923	0.673161	0.69959	0.188187	0.146254	0.621533	0.356326	0.401439	0.462834	0.708609	0.274633	0.12473	0.368421	0.367299	0.100656	0.287714	0.215525	0.694111
	1-(I/Imax)	0.475373	0.21668	0.508068	0.817208	0.516367	0.38961	0.402247	0.407572	0.79386	0.489736	0.710702	0.417476	0.663469	0.535302	0.474286	0.333767	0.813439	0.586571	0.779967	0.523389	0.756974	0.874946	0.808012	0.825383	0.565986	0.843077	0.326839	0.30041	0.811813	0.853746	0.378467	0.643674	0.598561	0.537166	0.291391	0.725367	0.87527	0.631579	0.632701	0.899344	0.712286	0.784475	0.305889
S667A	TOCRIS
	Type	S667A	S667A	S667A	S667A	S667A	S667A	S667A	S667A	S667A	S667A	S667A	S667A
	EXP	5577-4	5579-6	5581-8	5585-3	5588-6	5593-11	5596-4	5599-7	5611-10	5615-14	5622-6	5625-9
	Leak	9	20	39	10	25	24	11	13	18	14	35	22
	GSK Pre salb	864	1534	4498	2684	4111	3090	1307	3340	2875	518	3242	2300
	GSK Post salb	357	872	2271	1450	2549	1211	752	1940	1653	258	2487	1918
	GSK Pre S - leak	855	1514	4459	2674	4086	3066	1296	3327	2857	504	3207	2278
	GSK Post S- leak	348	852	2232	1440	2524	1187	741	1927	1635	244	2452	1896
	Normalized	0.407018	0.562748	0.500561	0.538519	0.617719	0.387149	0.571759	0.5792	0.572279	0.484127	0.764577	0.832309
	1-(I/Imax)	0.592982	0.437252	0.499439	0.461481	0.382281	0.612851	0.428241	0.4208	0.427721	0.515873	0.235423	0.167691
S687A	SIGMA
	Type	M	M	M	M	M	M	M	M	M	M	M	M	M	M
	EXP	1987	2005	2007	1535-0	1535-5	1535-7	1535-9	2011	2014	2018	2185-5	2190-10	2195-15	2201-20
	Leak	6	132	23	22	34	19	23	52	29	34	16	51	9	17
	GSK Pre salb	418	2588	3912	3379	1580	4500	6430	4112	4068	4199	1581	1748	2057	2113
	GSK Post salb	284	1740	3370	1598	978	3810	3021	3431	3673	3038	1171	1335	1020	1337
	GSK Pre S - leak	412	2456	3889	3357	1546	4481	6407	4060	4039	4165	1565	1697	2048	2096
	GSK Post S- leak	278	1608	3347	1576	944	3791	2998	3379	3644	3004	1155	1284	1011	1320
	Normalized	0.674757	0.654723	0.860633	0.469467	0.610608	0.846017	0.467926	0.832266	0.902204	0.721248	0.738019	0.756629	0.493652	0.629771
	1-(I/Imax)	0.325243	0.345277	0.139367	0.530533	0.389392	0.153983	0.532074	0.167734	0.0977965	0.278752	0.261981	0.243371	0.506348	0.370229
S667A-S6887A
	Type	M	M	M	M	M	M	M	M	M	M	M	M
	EXP	5770-5	5776-10	5778-12	5781-14	5789-20	5793-3	5795-5	5797-7	5801-11	5864-19	5616-11	5894-14
	Leak	33	312	39	47	38	44	22	65	167	25	34	28
	GSK Pre salb	2190	1382	3402	1454	3793	2390	1856	1283	5936	2548	9664	1006
	GSK Post salb	2189	1380	2064	1333	3791	1896	1615	1280	5631	2258	11419	701
	GSK Pre S - leak	2157	1070	3363	1407	3755	2346	1834	1218	5769	2523	9723	978
	GSK Post S- leak	2156	1068	2025	1286	3753	1852	1593	1215	5464	2233	9722	673
	Normalized	0.999536	0.998131	0.602141	0.914001	0.999467	0.789429	0.868593	0.997537	0.947131	0.885057	0.999897	0.688139
	1-(I/Imax)	0.000463607	0.00186916	0.397859	0.0859986	0.000532623	0.210571	0.131407	0.00246305	0.0528688	0.114943	0.000102849	0.311861

## Sheet: Panel C
	Panel C
	Dose response Curve
	1.3min different concentrations
	1.3m GSK 1uM
	outside out										W	T													S667A																	S687A
			25 nM	3191-1	3197-7	3198-8	3197-9	3202-12	3203-13						0.168113				25nM																25nM
			EXP												0.00244101				EXP	3267-3	3289-5	3291-7	3294-10	3295-11											EXP	3341-4	3345-8	3347-10	3349-12	3344-7
			Leak	5	7	19	14	43	18						0.0657534				Leak	22	15	17	21	17											Leak	21	25	30	7	81
			GSK25	160	13	43	17	53	21						0.0020339	Average	0.0412648		GSK25	92	16	28	128	26						0.0449294					GSK25	131	33	196	36	1359					0.0353925
			GSK1000	927	2465	384	1489	1282	2568						0.00807103	SD	0.0670005		GSK1000	1580	442	551	2193	2606						0.00234192					GSK1000	3129	2287	4172	2756	3741					0.00353669
			GSK25-leak	155	6	24	3	10	3						0.00117647	SEM	0.0273529		GSK25-leak	70	1	11	107	9						0.0205992		Average	0.024122		GSK25-leak	110	8	166	29	1278					0.0400773		Average	0.0877472
			GSK1000-leak	922	2458	365	1475	1239	2550										GSK1000-leak	1558	427	534	2172	2589						0.0492633		SD	0.0222377		GSK1000-leak	3108	2262	4142	2749	3660					0.0105493		SD	0.146979
			Normalized	0.168113	0.00244101	0.0657534	0.0020339	0.00807103	0.00117647										Normalized	0.0449294	0.00234192	0.0205992	0.0492633	0.00347625						0.00347625		SEM	0.00994501		Normalized	0.0353925	0.00353669	0.0400773	0.0105493	0.34918					0.34918		SEM	0.0657311
			50nM												0.00738137				50 nM																50nM
			EXP	3207-3	3213-9	3215-11	3220-16	3221-17	3224-20						0.00197707				EXP	3299-4	3300-5	3304-8	3309-14	3310-15											EXP	3350-1	3353-4	3355-6	3356-7	3357-8
			Leak	31	22	23	116	26	23						0.00149514				Leak	23	40	23	33	10											Leak	39	10	11	25	35
			GSK50	52	27	29	242	924	53						0.203883	Average			GSK50	95	141	542	201	101						0.0422535					GSK50	195	101	766	117	121					0.0521914
			GSK1000	2876	2551	4036	734	3286	5305						0.27546	SD	0.0826461		GSK1000	1727	5636	3485	3503	2763						0.0180486					GSK1000	3028	783	1753	3307	2729					0.117723
			GSK50-leak	21	5	6	126	898	30						0.00567967	SEM	0.12374		GSK50-leak	72	101	519	168	91						0.149913		Average	0.0583371		GSK50-leak	156	91	755	92	86					0.43341		Average	0.132656
			GSK1000-leak	2845	2529	4013	618	3260	5282								0.0505164		GSK1000-leak	1704	5596	3462	3470	2753						0.048415		SD	0.052454		GSK1000-leak	2989	773	1742	3282	2694					0.0280317		SD	0.171933
			Normalized	0.00738137	0.00197707	0.00149514	0.203883	0.27546	0.00567967						0.312306				Normalized	0.0422535	0.0180486	0.149913	0.048415	0.0330548						0.0330548		SEM	0.0234581		Normalized	0.0521914	0.117723	0.43341	0.0280317	0.0319228					0.0319228		SEM	0.0768908
															0.152411
															0.755706
			100nM												0.729045				100 nM																100nM
			EXP	3245-12	3249-16	5884-5	5885-6	5887-8	5904-2	5905-3	5907-5	3231-27	3232-28	3237-4	0.510574				EXP	3310-1	3311-2	3315-6	3316-7	3318-9											EXP	3359-1	3361-3	3363-5	3364-6	3369-10	3370-11
			Leak	36	53	22	35	93	51	11	55	44	22	55	0.187611				Leak	38	45	64	20	25											Leak	14	15	16	50	28	5				0.686743
			GSK100	338	641	916	409	431	1005	669	1030	959	102	661	1.34012				GSK100	1354	74	960	377	578						0.463543					GSK100	1998	1291	2211	1775	299	434				0.52381
			GSK1000	1003	3911	1205	548	755	5136	502	1074	5185	508	2655	0.95682				GSK1000	2877	311	2925	1394	1617						0.109023					GSK1000	2903	2451	4686	2021	2495	2464				0.470021
			GSK100-leak	302	588	894	374	338	954	658	975	915	80	606	0.177981	Average	0.501842		GSK100-leak	1316	29	896	357	553						0.313177		Average	0.298586		GSK100-leak	1984	1276	2195	1725	271	429				0.87519		Average	0.473346
			GSK1000-leak	967	3858	1183	513	662	5085	491	1019	5141	486	2600	0.164609	SD	0.396671		GSK1000-leak	2839	266	2861	1374	1592						0.259825		SD	0.129653		GSK1000-leak	2889	2436	4670	1971	2467	2459				0.10985		SD	0.293611
			Normalized	0.312306	0.152411	0.755706	0.729045	0.510574	0.187611	1.34012	0.95682	0.177981	0.164609	0.233077	0.233077	SEM	0.119601		Normalized	0.463543	0.109023	0.313177	0.259825	0.347362						0.347362		SEM	0.0579826		Normalized	0.686743	0.52381	0.470021	0.87519	0.10985	0.174461				0.174461		SEM	0.119866
															0.404996
			250nM												0.589033				250nM																250nM
			EXP	3253-4	3272-23	3273-24	3278-29	5895-15	5898-18	5900-20	5903-23	5909-6	5910-7		0.529086				EXP	3320-2	3321-3	3324-6	3330-12	3338-20											EXP	3371-2	3373-4	3377-8	3379-10	3375-6
			Leak	23	34	24	26	12	42	58	13	10	14		0.803738				Leak	40	23	23	26	136											Leak	60	21	42	23	60
			GSK250	558	1033	788	198	89	620	1038	2621	2052	2074		0.865169				GSK250	2424	2728	829	2108	3869						0.560546					GSK250	3366	3577	1818	696	3412					0.795859
			GSK1000	1344	1730	1468	240	101	561	909	2639	1877	2254		1.11368				GSK1000	4293	3907	1080	4041	5731						0.696447					GSK1000	4214	4094	2588	613	4175					0.873067
			GSK250-leak	535	999	764	172	77	578	980	2608	2042	2060		1.15159				GSK250-leak	2384	2705	806	2082	3733						0.762535		Average	0.641057		GSK250-leak	3306	3556	1776	673	3352					0.697565		Average	0.86435
			GSK1000-leak	1321	1696	1444	214	89	519	851	2626	1867	2240		0.993145	Average	0.846381		GSK1000-leak	4253	3884	1057	4015	5595						0.518555		SD	0.0999968		GSK1000-leak	4154	4073	2546	590	4115					1.14068		SD	0.166897
			Normalized	0.404996	0.589033	0.529086	0.803738	0.865169	1.11368	1.15159	0.993145	1.09373	0.919643		1.09373	SD	0.261743		Normalized	0.560546	0.696447	0.762535	0.518555	0.667203						0.667203		SEM	0.0447199		Normalized	0.795859	0.873067	0.697565	1.14068	0.814581					0.814581		SEM	0.0746386
															0.919643	SEM	0.0827705
			500nM																500nM																500nM
			EXP	1582-5	1582-6	1582-7	1592-1	1592-2	1592-3										EXP	3433-15	3434-16	3435-17	3439-21	3440-22											EXP	3390-9	3391-10	3392-1
			Leak	63	42	62	54	64	54						0.799659				Leak	35	16	67	60	62											Leak	11	24	25
			GSK500	1001	1016	474	1071	826	451						0.83677				GSK500	1305	2385	3497	2382	2742						0.924309					GSK500	365	5552	1181
			GSK1000	1236	1206	508	1191	843	456						0.923767				GSK1000	1409	2743	4048	2364	3688						0.86872					GSK1000	351	6286	1717							1.04118
			GSK500-leak	938	974	412	1017	762	397						0.894459	Average	0.903399		GSK500-leak	1270	2369	3430	2322	2680						0.861593		Average	0.880308		GSK500-leak	354	5528	1156							0.882785		Average	0.869059
			GSK1000-leak	1173	1164	446	1137	779	402						0.978177	SD	0.0753279		GSK1000-leak	1374	2727	3981	2304	3626						1.00781		SD	0.0982546		GSK1000-leak	340	6262	1692							0.683215		SD	0.179375
			Normalized	0.799659	0.83677	0.923767	0.894459	0.978177	0.987562						0.987562	SEM	0.0307525		Normalized	0.924309	0.86872	0.861593	1.00781	0.739106						0.739106		SEM	0.0439408		Normalized	1.04118	0.882785	0.683215									SEM	0.103562
			800nM																800nM											0.795249					800nM
			EXP	1585-9	1586-0	1586-2	1591-4	1591-5											EXP	3445-1	3447-3	3450-6	3452-8	3455-11	3460-16	3461-17	3463-18	3464-19		0.982645					EXP	3401-9	3402-10	3412-17	3413-18	3415-20	3415-21	3417-23			0.920763
			Leak	83	78	16	34	49											Leak	50	58	54	14	16	19	42	90	33		0.906713					Leak	91	8	38	22	9	29	22			1.0483
			GSK800	2218	1596	179	364	780							0.860193				GSK800	2159	4531	1891	528	2783	71	1197	4941	3162		1.01381					GSK800	3856	1549	3703	2409	538	2515	1373			0.927848
			GSK1000	2565	1651	164	365	807							0.965035				GSK1000	2702	4610	2080	521	2602	78	1092	5021	3041		1.06999					GSK1000	4180	1478	3988	2111	567	2597	1406			1.14265
			GSK800-leak	2135	1518	163	330	731							1.10135	Average	0.977588		GSK800-leak	2109	4473	1837	514	2767	52	1155	4851	3129		0.881356		Average	0.974863		GSK800-leak	3765	1541	3665	2387	529	2486	1351			0.948029		Average	0.990259
			GSK1000-leak	2482	1573	148	331	758							0.996979	SD	0.0863234		GSK1000-leak	2652	4552	2026	507	2586	59	1050	4931	3008		1.1		SD	0.0976518		GSK1000-leak	4089	1470	3950	2089	558	2568	1384			0.968069		SD	0.079364
			Normalized	0.860193	0.965035	1.10135	0.996979	0.96438							0.96438	SEM	0.038605		Normalized	0.795249	0.982645	0.906713	1.01381	1.06999	0.881356	1.1	0.983776	1.04023		0.983776		SEM	0.0325506		Normalized	0.920763	1.0483	0.927848	1.14265	0.948029	0.968069	0.976156			0.976156		SEM	0.0299968
																														1.04023
[truncated: 10 more columns]
